# Supplementary material for: Screening of poly-beta amino ester coated emulsion of ketorolac for cartilage delivery
Source: Royal Society of Chemistry journal article supplement (doi:10.1039/d4tb00313f), 2024-01-01
Supplement: d4tb00313f1.pdf [file d4tb00313f1.pdf]

# Screening of poly-beta amino esters coated emulsion of ketorolac for cartilage delivery

By

Tahani Saeedi <sup>a</sup>, Polina Prokopovich <sup>a,\*</sup>

## Supplementary info

## Untreated cartilage tissue

## GAG depleted cartilage tissue

**A1**

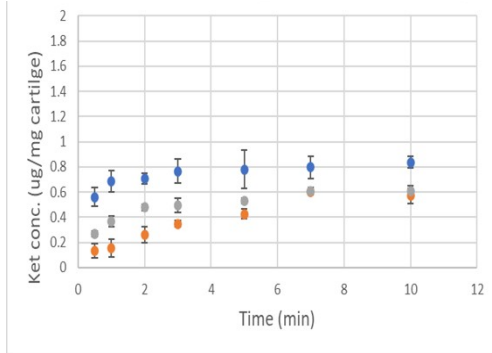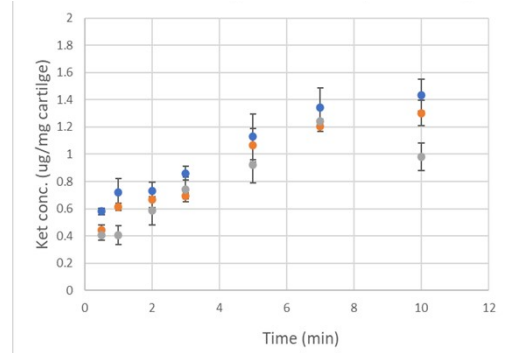

**B1**

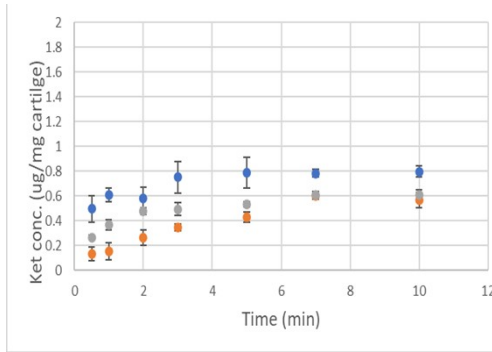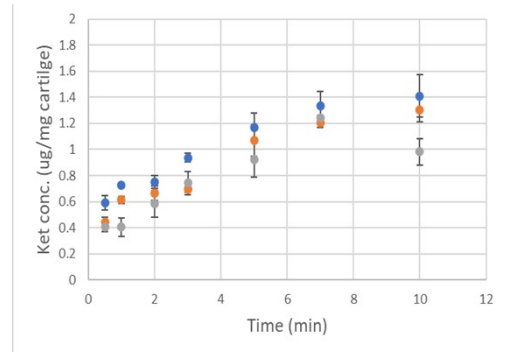

**D1**

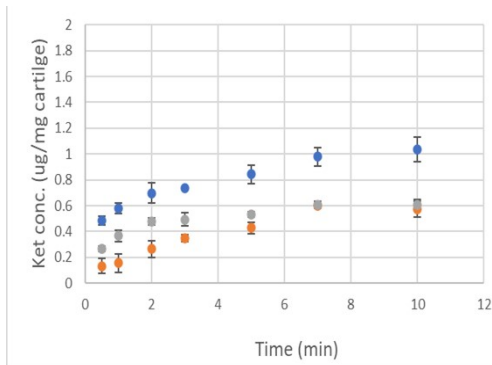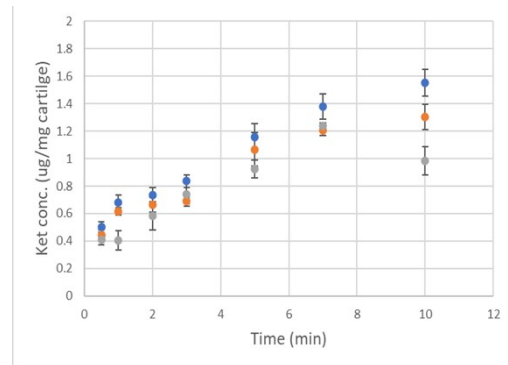

**E1**

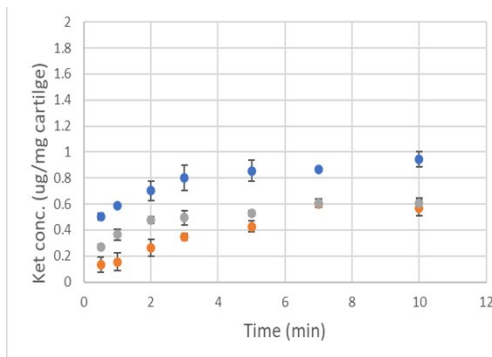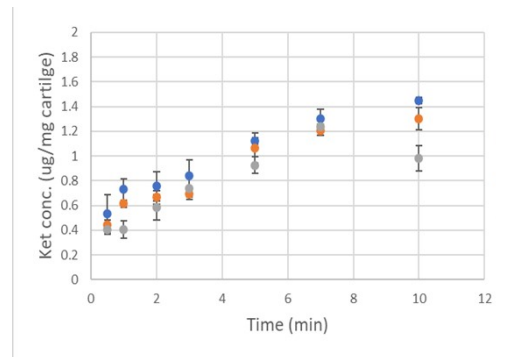

**F1**

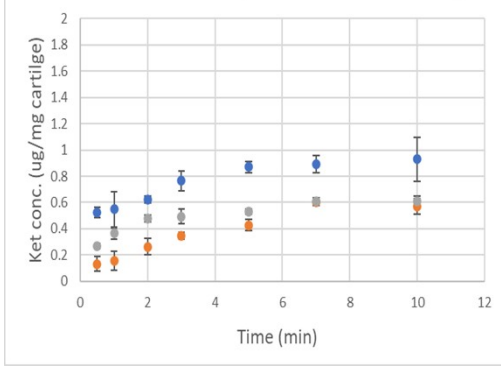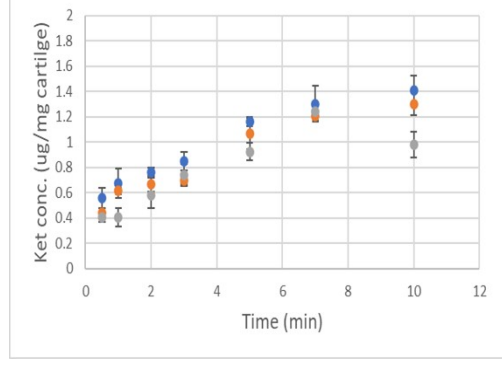

**A3**

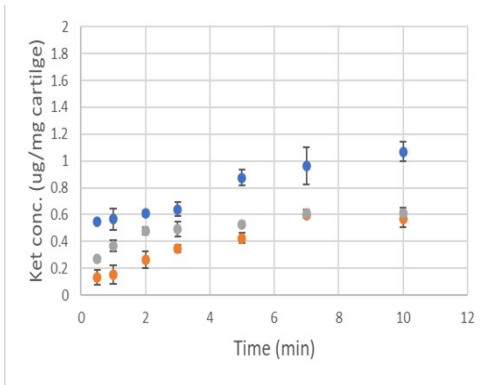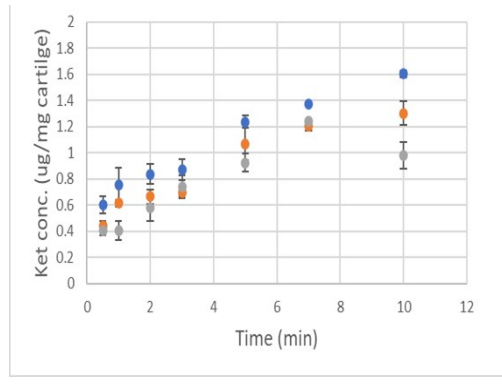

**B3**

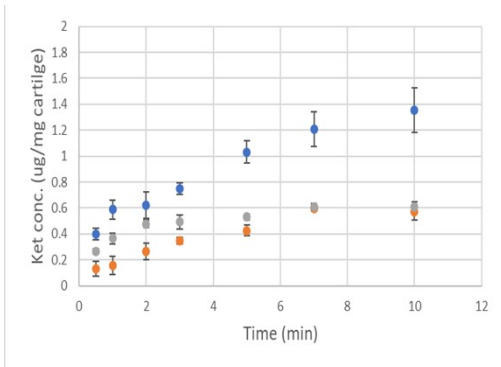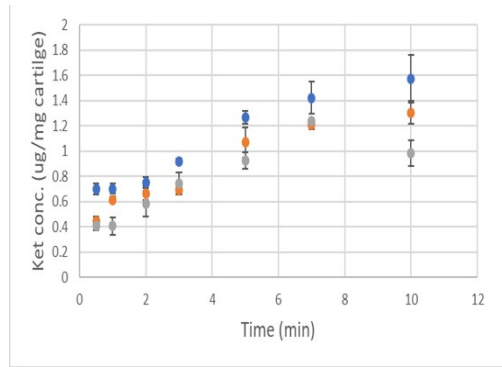

**D3**

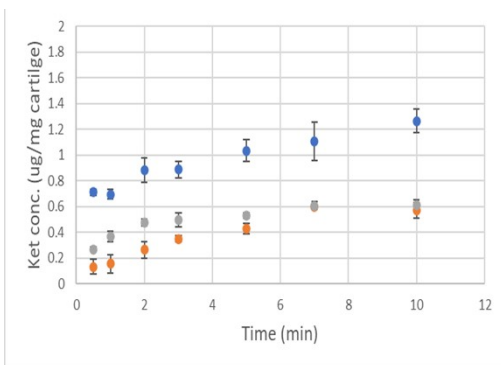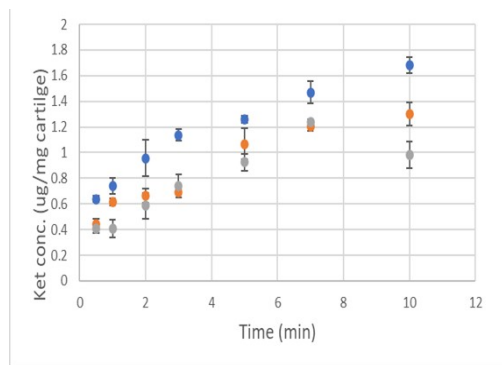

**E3**

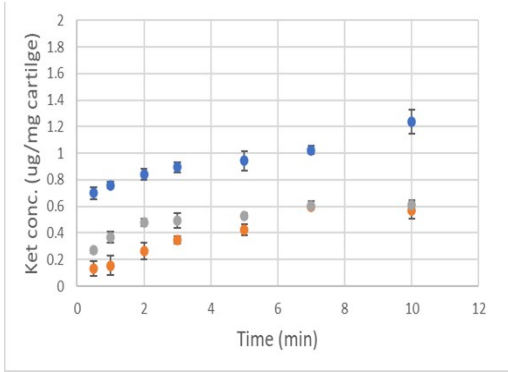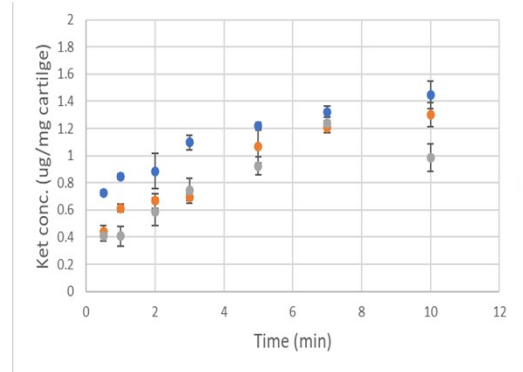

**F3**

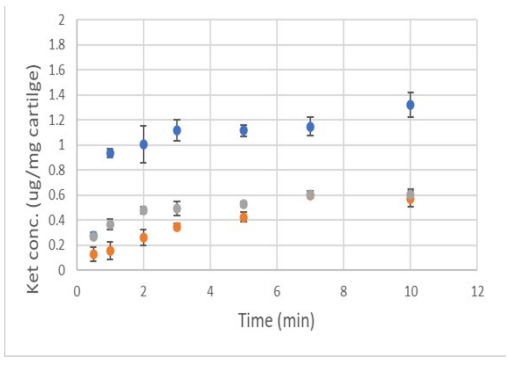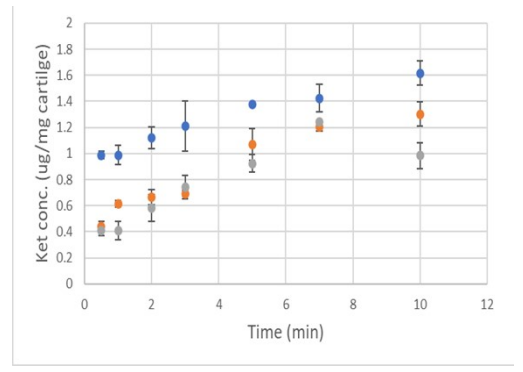

**A5**

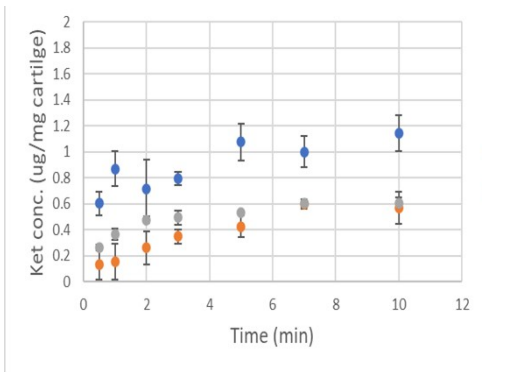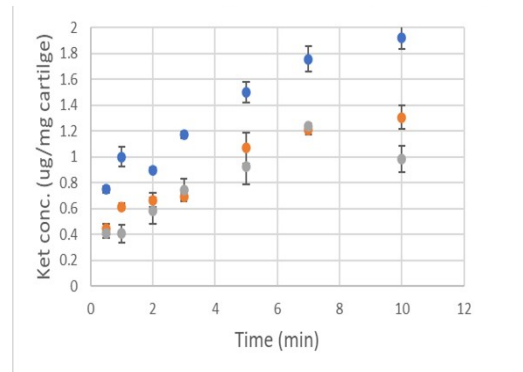

**D5**

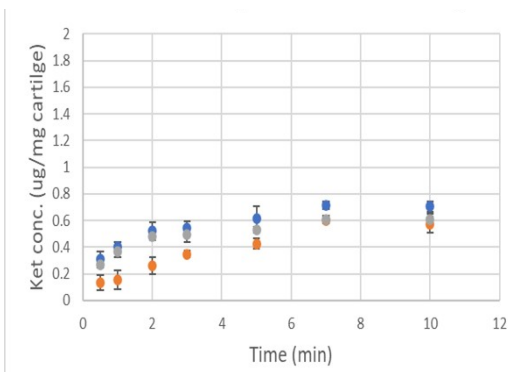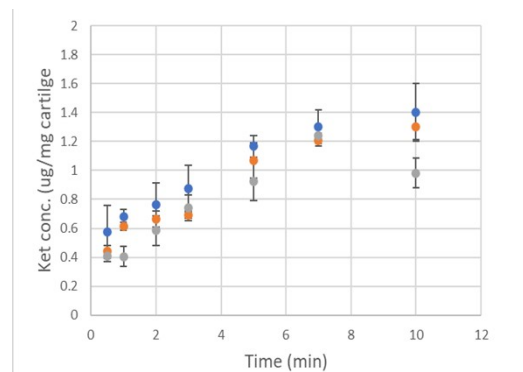

**E5**

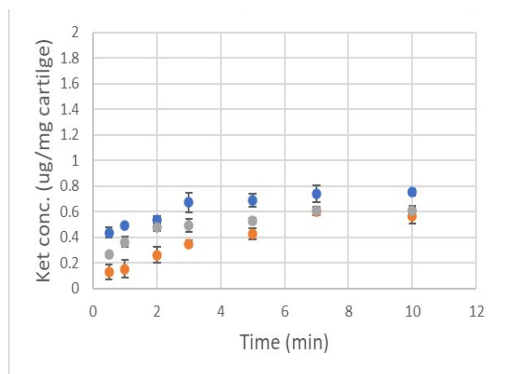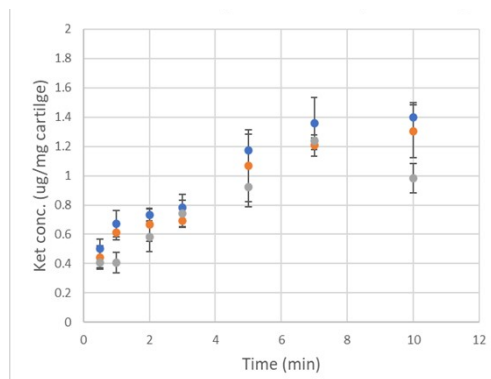

**F5**

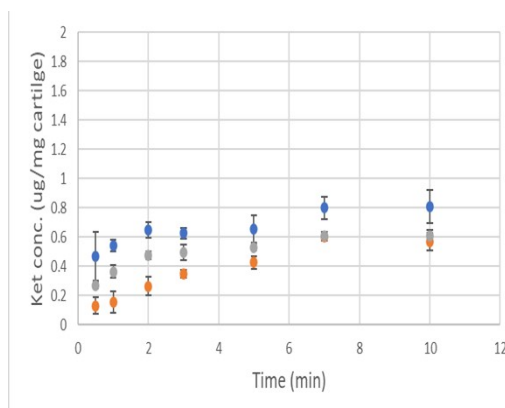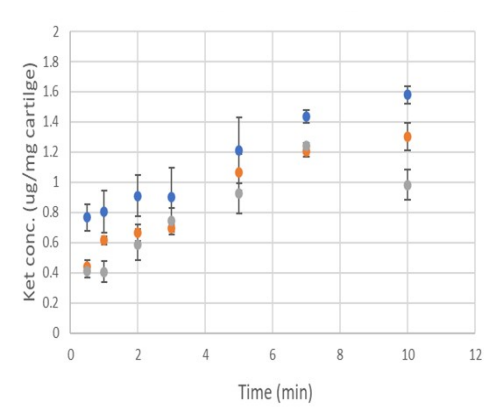

Figure S1: Comparison of ketorolac uptake into cartilage after 10 min exposure to (●) ketorolac o/w emulsion saturated with PBAE, (●) ketorolac in PBS, and (●) ketorolac o/w emulsion in both untreated and GAG depleted cartilage using different PBAEs.

## Untreated cartilage tissue

## GAG depleted cartilage tissue

**A1**

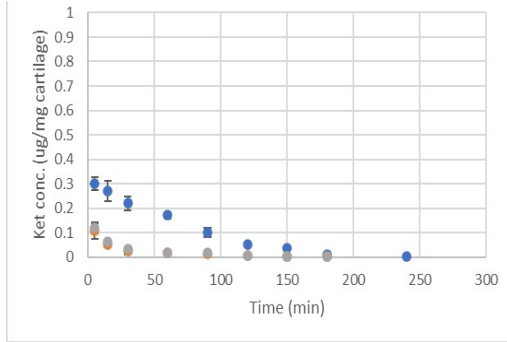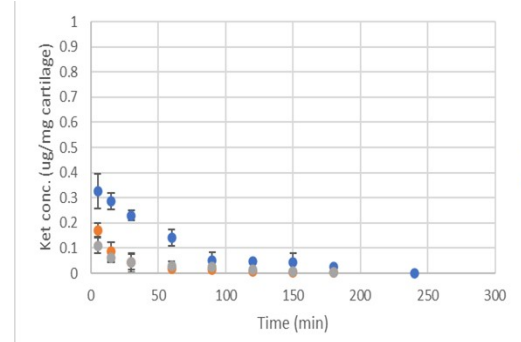

**B1**

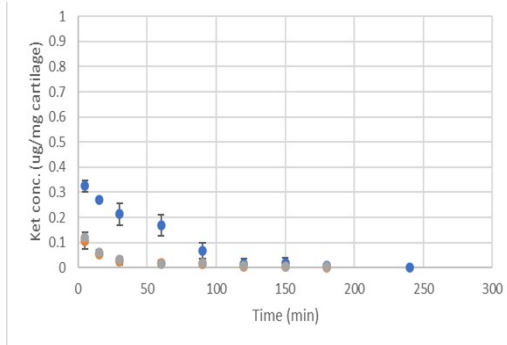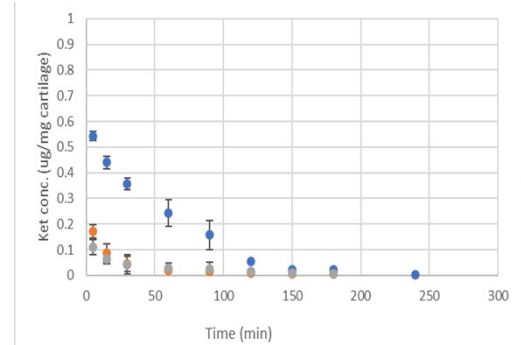

**D1**

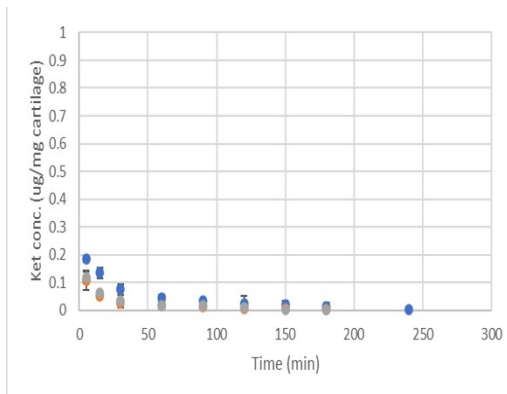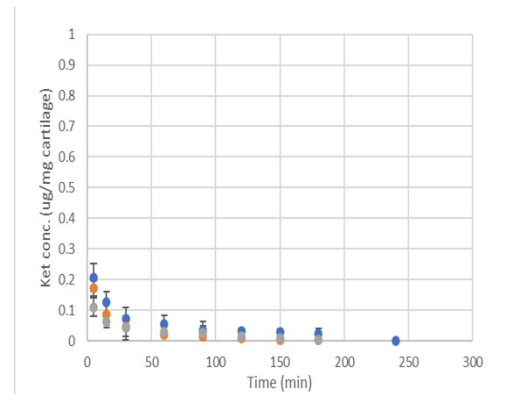

**E1**

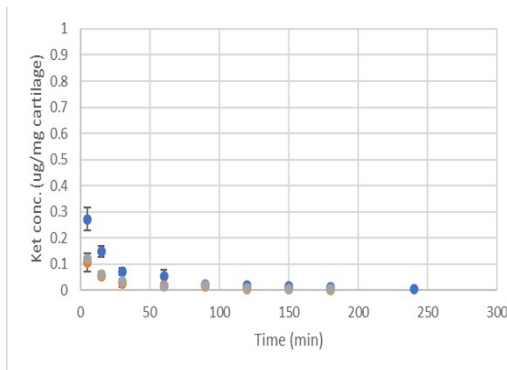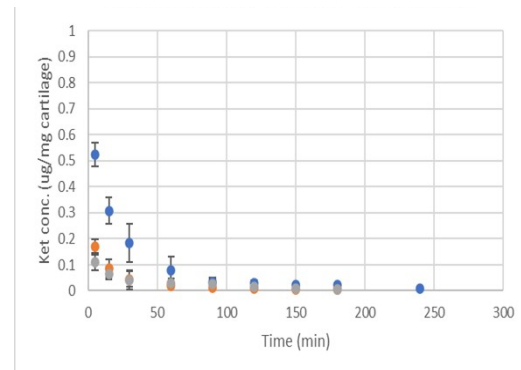

**F1**

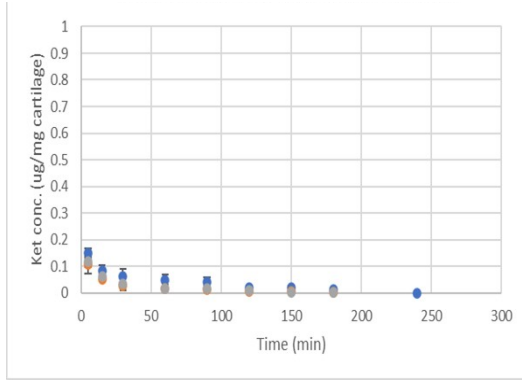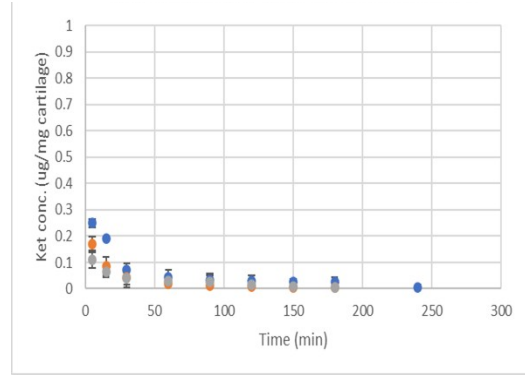

**A3**

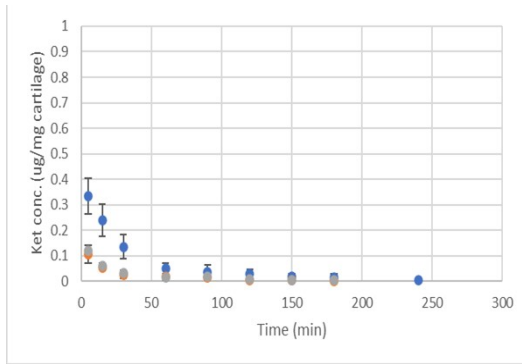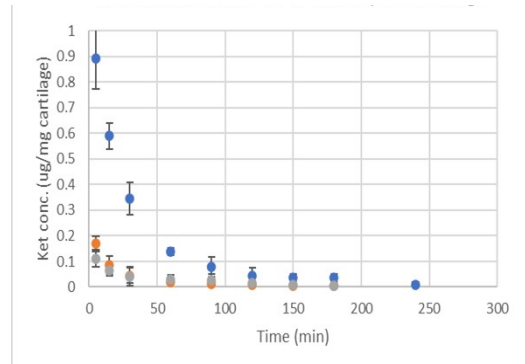

**B3**

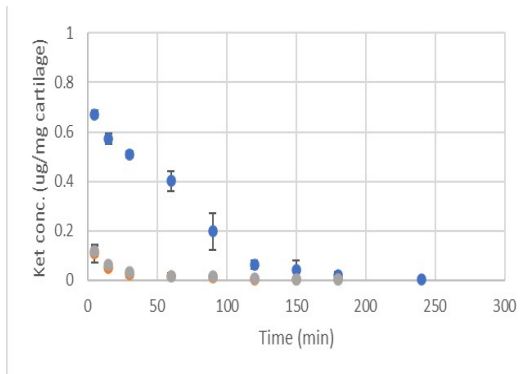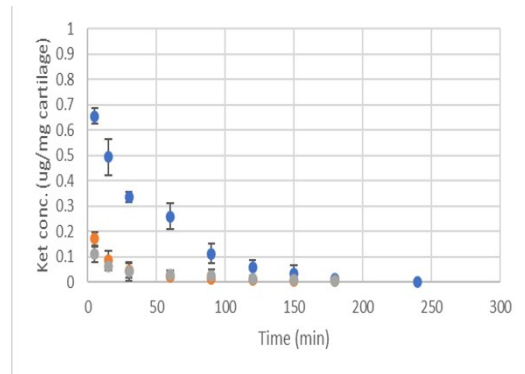

**D3**

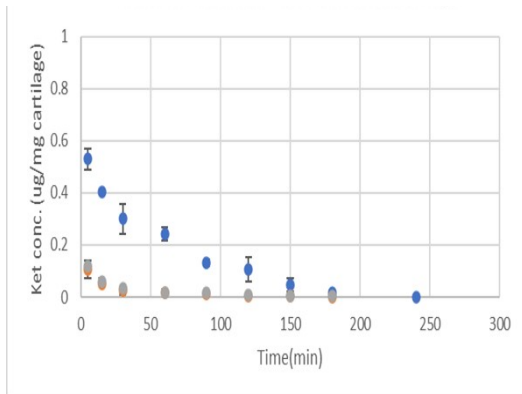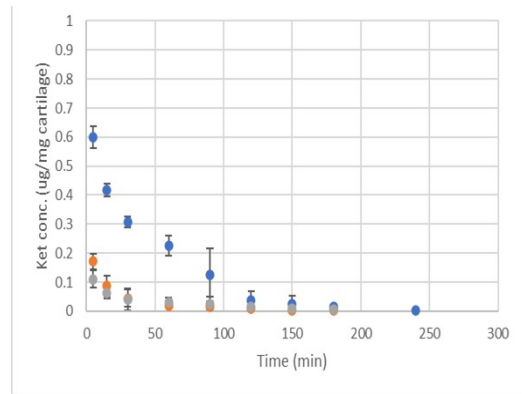

**E3**

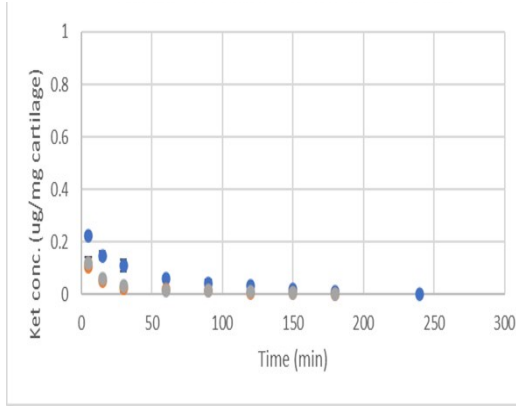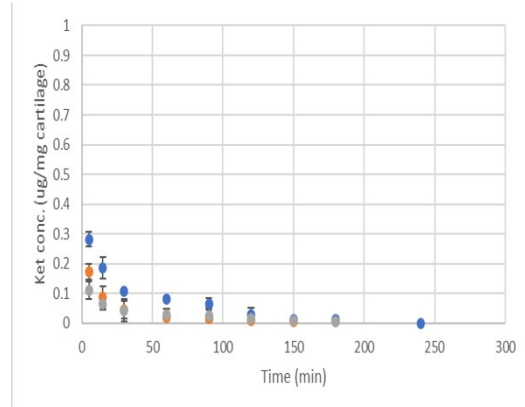

**F3**

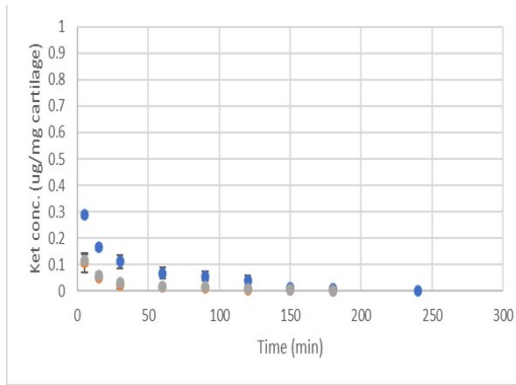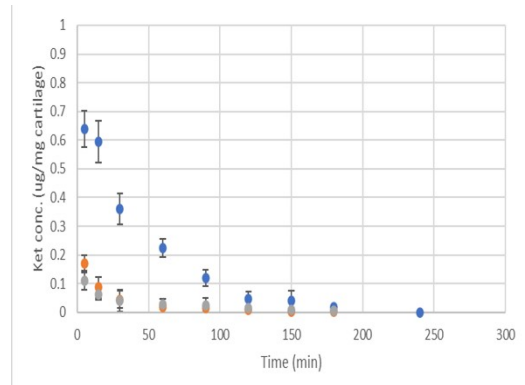

**A5**

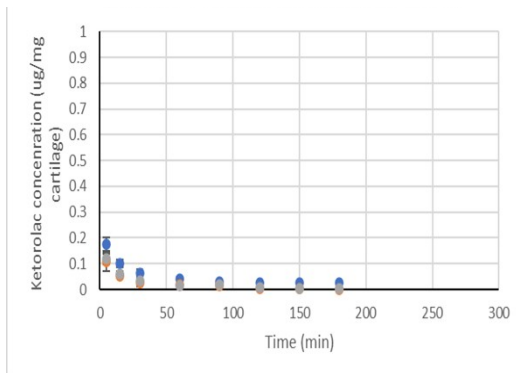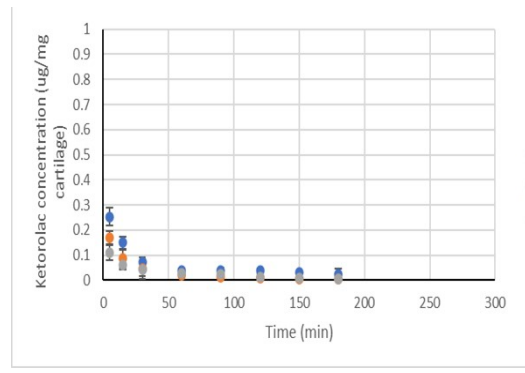

**D5**

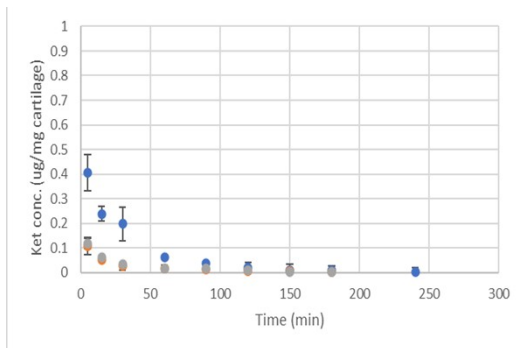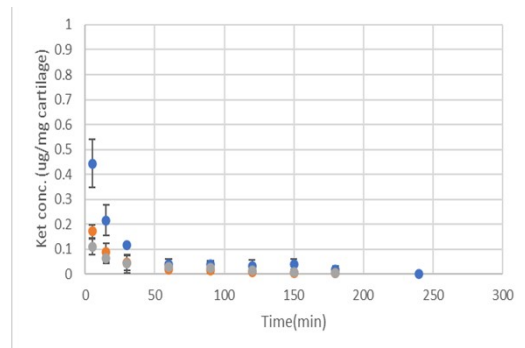



**E5**

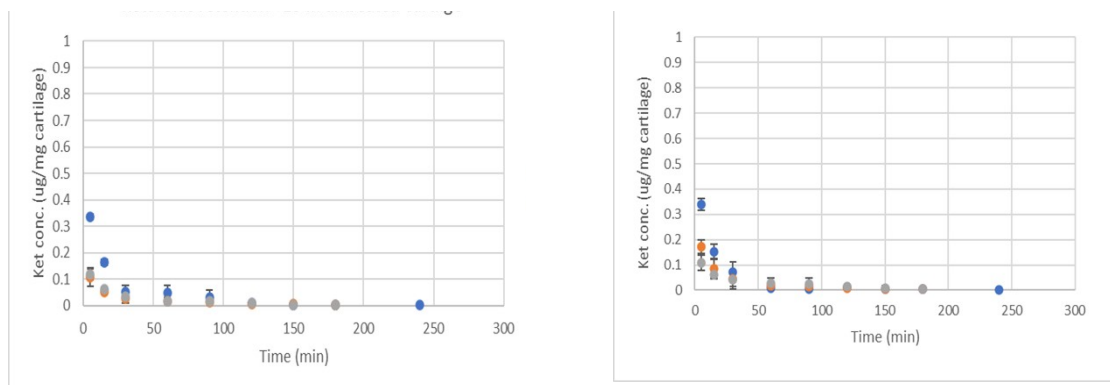

**F5**

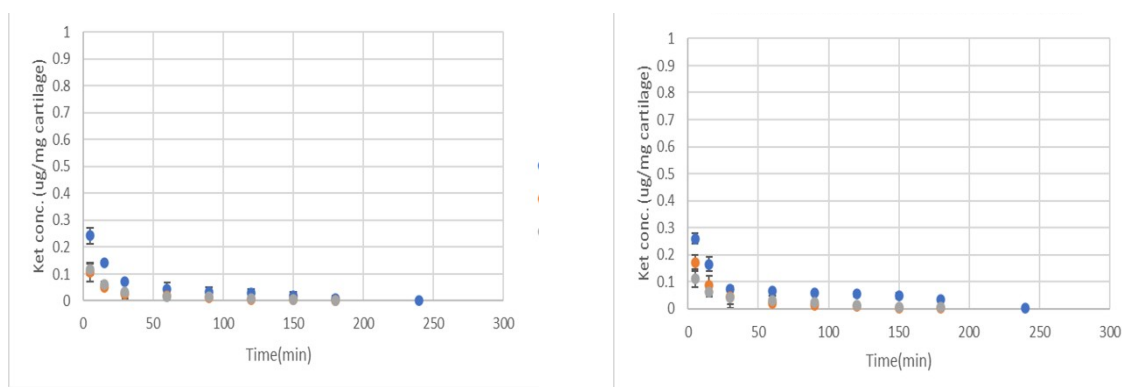

Figure S2: Comparison of ketorolac retention into cartilage for 300 min (5 hours) after 10 min exposure to (●) ketorolac o/w emulsion saturated with PBAE, (●) ketorolac in PBS, and (●) ketorolac o/w emulsion in both untreated and GAG depleted cartilage using different PBAEs.

**Media only**

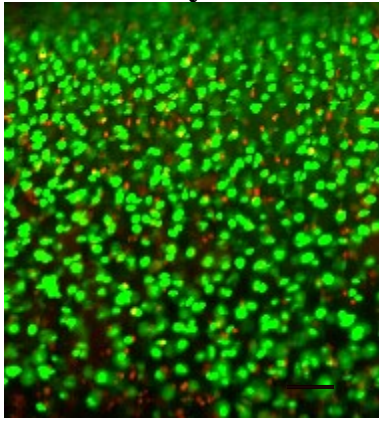

**IL-1 $\alpha$**

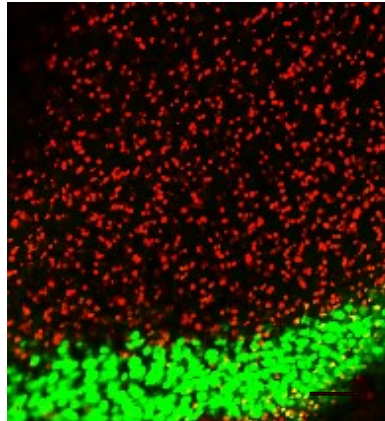

**B5 + IL-1 $\alpha$**

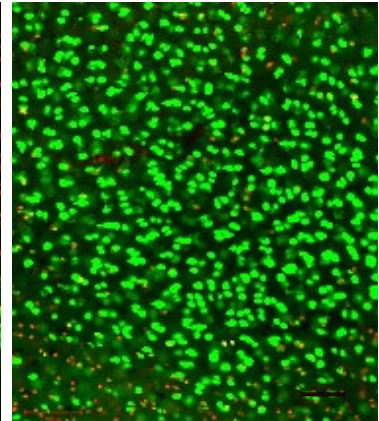

**Ketorolac emulsion coated with B5**

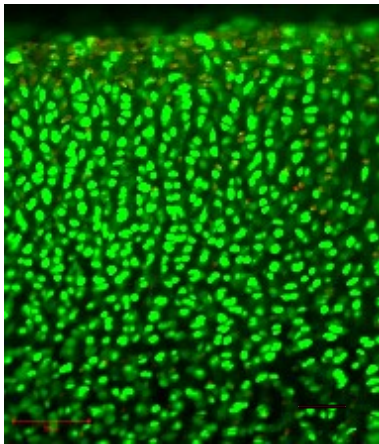

**Ketorolac emulsion coated with B5 + IL-1 $\alpha$**

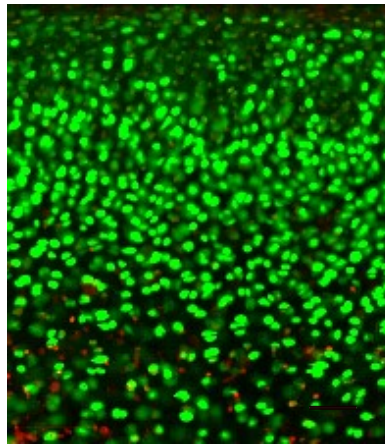

**F3 + IL-1 $\alpha$**

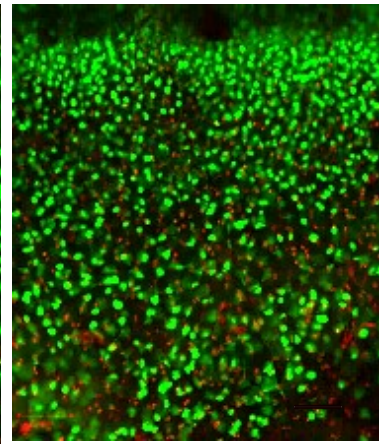

**Ketorolac emulsion coated with F3**

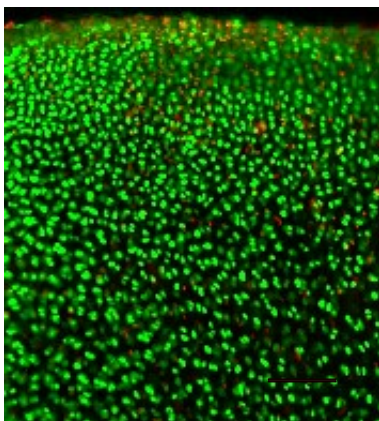

**Ketorolac emulsion coated with F3+IL-1 $\alpha$**

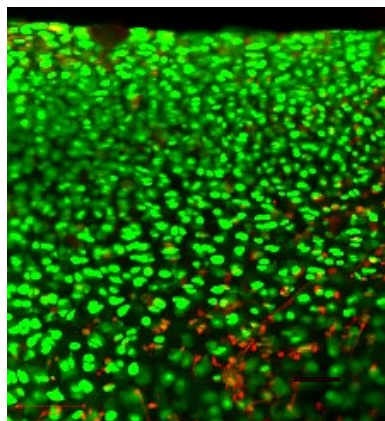

*Figure S3 Examples of images of live/dead fluorescently stained sections of bovine cartilage explants exposed to IL-1 $\alpha$  (1 ng/ml) and coated with F3 and B5 or uncoated ketorolac emulsions on Day 2. Live*

*cells were stained green by calcein, and dead cells were stained red by ethidium homodimer. Scale bar 100 $\mu$ m.*
